# Supplementary material
Source: PubMed Central journal article supplement (PMC7376183)
Supplement: mmc1.pdf [file mmc1.pdf]

**Biophysical Journal, Volume 119**

**Supplemental Information**

**The C-Terminus and Third Cytoplasmic Loop Cooperatively Activate  
Mouse Melanopsin Phototransduction**

**Juan C. Valdez-Lopez, Stephen T. Petr, Matthew P. Donohue, Robin J. Bailey, Meheret  
Gebreeziabher, Evan G. Cameron, Julia B. Wolf, Veronika A. Szalai, and Phyllis R.  
Robinson**

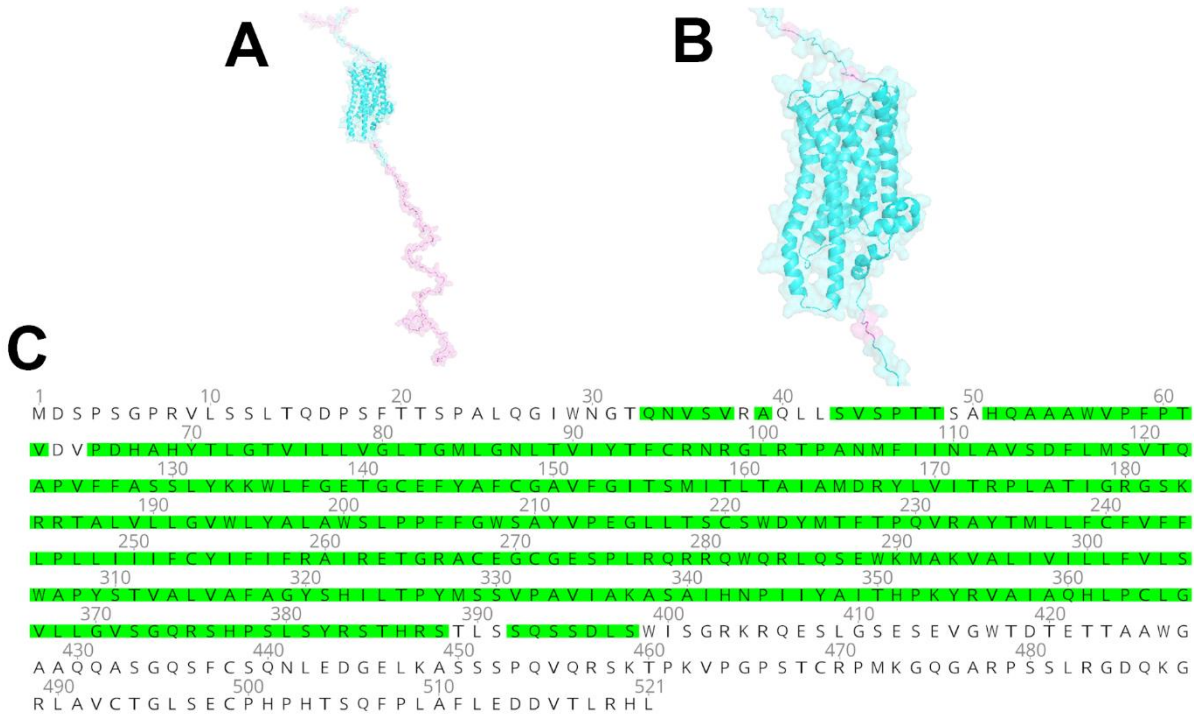

**Supplemental Figure 1: Template sequence coverage of mouse melanopsin model.** (A & B) Mouse melanopsin homology model depicting amino acids on melanopsin that were modeled using amino acids on the *T. pacificus* template. Blue residues denote residues covered by template, pink residues are non-covered residues. (C) Template sequence coverage plotted on melanopsin's amino acid sequence.

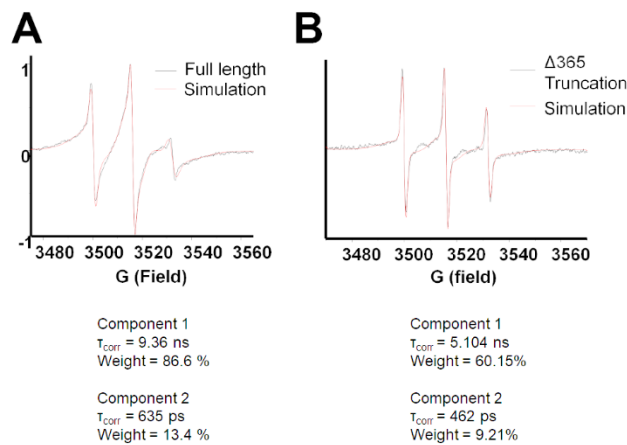

**Supplemental Figure 2:** *MATLAB/EasySpin simulation of experimental EPR data.* (A) Simulation spectrum fitting the full-length melanopsin C268 EPR spectrum or (B) melanopsin C268  $\Delta$ 265, C-terminal truncated mutant. Rotational correlation times ( $\tau_{\text{corr}}$ ) calculated from the simulation, depicted below the graph. Two components calculated for each construct, the 1<sup>st</sup> and slower components represents a more immobile component, derived from spin-label attached to melanopsin, while the 2<sup>nd</sup> and faster component represents a faster component, likely from excess, free spin-label in solution.

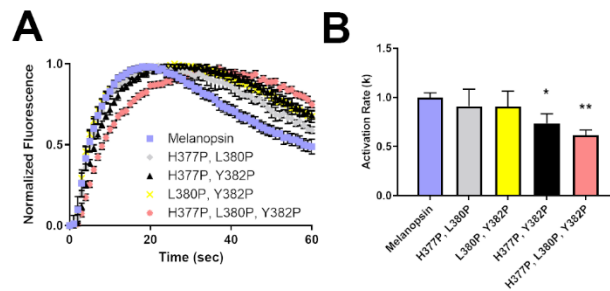

**Supplemental Figure 3:** Calcium imaging of double and triple melanopsin C-terminus proline point mutants. (A) Calcium imaging of HEK293 cells expressing melanopsin C-terminal mutants, synthesized with combinations of point mutations at residues H377, L380, and Y382 to proline residues. (B) Calculated activation rates of melanopsin constructs depicted in (A). All error bars represent standard error of the mean (S.E.M.) of three independent transfections. Statistical significance tested by using Student's t-test, \*, \*\*, \*\*\*, \*\*\*\* represent P-values <0.05, 0.01, 0.001, and 0.0001, respectively. All constructs compared to wild-type melanopsin's rate, and statistical significance is indicated over individual bars.

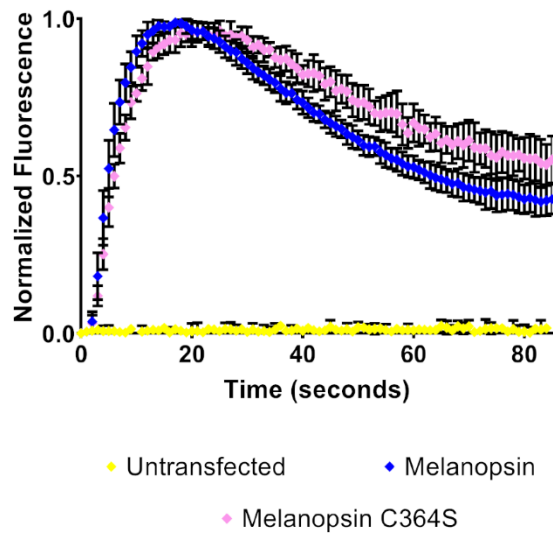

**Supplemental Figure 4:** *Calcium imaging of melanopsin palmitoylation mutant.* Representative calcium imaging of melanopsin C364S, with mutation of melanopsin's predicted C-terminus palmitoylation site, C364 to a serine residue. Error bars depict standard deviation (S.D.).

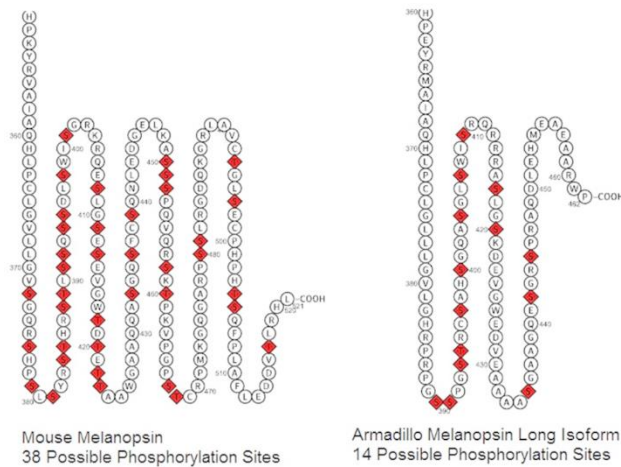

**Supplemental Figure 5:** *2-dimensional schematics comparing mouse and armadillo melanopsin C-termini.*
